# Supplementary material for: Development of a novel pink-eyed dilution mouse model showing progressive darkening of the eyes and coat hair with aging
Source: PubMed Central journal article supplement — Exp Anim. 2015 Feb 2;64(2):207–20. doi: 10.1538/expanim.14-0101 (PMC4427736; doi:10.1538/expanim.14-0101), 2015-02-02
Supplement: expanim-64-207-s001.pdf [file expanim-64-207-s001.pdf]

**Supplementary data 1.** List of primers used in this study

| Name        | Direction <sup>a)</sup> | Position <sup>b)</sup> | Sequence (5' to 3')      | Usage                         |
|-------------|-------------------------|------------------------|--------------------------|-------------------------------|
| mP-1        | F                       | 5                      | GTGCCTGCTGAGAAATCTTACACC | cDNA amplification            |
| mP-2        | R                       | 532                    | AGCAACCTCTTTACCCAGCATG   | cDNA amplification            |
| mP-3        | F                       | 411                    | CTCCTCTGCTCTGGAATTCATC   | cDNA amplification            |
| mP-4        | R                       | 640                    | GTGATCTTTATCCACCGCACAC   | cDNA amplification            |
| mP-5        | F                       | 533                    | ATGCTGGGTAAAGAGGTTGCTG   | cDNA amplification            |
| mP-6        | R                       | 1261                   | GGCCAGAGTCTCGAAATCAATC   | cDNA amplification            |
| mP-7        | F                       | 1261                   | GATTGATTTTCGAGACTCTGGCC  | cDNA amplification            |
| mP-8        | R                       | 1968                   | ACTTGACAAGCAGACTCCTGTCTG | cDNA amplification            |
| mP-9        | F                       | 1090                   | AAGCGTTGAAGCACAAGTGG     | cDNA amplification            |
| mP-10       | R                       | 1506                   | TGCAATGAGGACTTGTCTCG     | cDNA amplification            |
| mP-11       | F                       | 1506                   | CGAGACAAGTCCTCATTGCAGAAG | cDNA amplification            |
| mP-12       | R                       | 2333                   | CGTAGCAGTAAATGGGATGTTGTC | cDNA amplification            |
| mP-13       | F                       | 2333                   | GACAACATCCCATTTACTGCTACG | cDNA amplification            |
| mP-14       | R                       | 2602                   | TCCCACCACAATGTGAGCAATC   | cDNA amplification            |
| mP-15       | F                       | 2173                   | AGCACTCTTTGTGCTGATGG     | cDNA amplification            |
| mP-16       | R                       | 2351                   | GGAGTACAGGAATCATCGTAGC   | cDNA amplification            |
| mP-17       | F                       | 85592                  | GGACAAAACAGTGGTGCTTG     | Deletion region amplification |
| mP-18       | R                       | 91472                  | GAGCACAAGCTGCCTCAAG      | Deletion region amplification |
| mP-19       | R                       | 91805                  | CTCCGTGGGAAAGGATACAC     | Deletion region amplification |
| mP-20       | F                       |                        | TCCTGAGTTGGAGGAGAACAAG   | Promoter region amplification |
| mP-21       | R                       |                        | TACCTGATGACTCGCTGATCTC   | Promoter region amplification |
| mP-22       | F                       |                        | CTAATCTGTATGGAGGCACTGG   | Promoter region amplification |
| mP-23       | R                       |                        | CAAGCCTTCATAGGTGGCATAG   | Promoter region amplification |
| mP-24       | F                       |                        | ACCTGATAAGGCTTGGCTGAG    | Promoter region amplification |
| mP-25       | R                       |                        | AGAGACACACAGGTACAGAAGC   | Promoter region amplification |
| <i>Oca2</i> | F                       | 530                    | TGCATGCTGGGTAAAGAGGTT    | RT-qPCR                       |
|             | R                       | 595                    | TGCAAGATCCCGTTTCTCTGA    | RT-qPCR                       |
| <i>Actb</i> | F                       |                        | GGCTGTATCCCCTCCATCG      | RT-qPCR                       |
|             | R                       |                        | CCAGTTGGTAACAATGCCATGT   | RT-qPCR                       |
| <i>B2m</i>  | F                       |                        | TTCTGGTGCTTGTCTCACTGA    | RT-qPCR                       |
|             | R                       |                        | CAGTATGTTCCGCTTCCCATTC   | RT-qPCR                       |

<sup>a)</sup> F : forward primer; R: reverse primer. <sup>b)</sup> The position of 5' end of the primer to the mouse *Oca2* cDNA (NM\_021879.2) for mP-1 to mP-16 and to the mouse *Oca2* genome (NC\_000073.5) for mP-17 to mP-25

Wt 1 MRLNKDIRLASAVLEVELHQTSALSVPTCPDPGRLLTVKPATSNYKLGQADPCIPYAGEAAGKSVCVPEHTEFGSFLVKGSSSLKDLSFKEDTPLLWNS  
p-cas MRLNKDIRLASAVLEVELHQTSALSVPTCPDPGRLLTVKPATSNYKLGQADPCIPYAGEAAGKSVCVPEHTEFGSFLVKGSSSLKDLSFKEDTPLLWNS

Wt 101 SQKKRSQLMPVHHPEFIATEGSWENGLTAWQKCMKGKEVADLSALASSEKRDLAGSVHLRAQVSKLGCCVRWIKITGLFVFFVLCILFSLYPDQGKFW  
p-cas SQKKRSQLMPVHHPEFIATEGSWENGLTAWQKCMKGKEVADLSALASSEKRDLAGSVHLRAQVSKLGCCVRWIKITGLFVFFVLCILFSLYPDQGKFW

Wt 201 QLLAVSPLENYSVNLSGHADSMILQLDLAGALMAGGPSGSGKEEHVVVVVTQTDAAGNRRRRPQQLTYNWTVLLNPRSEHVVSRTFEIVSREAVSISIQ  
p-cas QLLAVSPLENYSVNLSGHADSMILQLDLAGALMAGGPSGSGKEEHVVVVVTQTDAAGNRRRRPQQVTYNWTVLLNPRSEHVMSRTFEIVSREAVFISIQ

Wt 301 ASLQQTRLVPLLLAHQFLGASVEAQVASAVAILAGVYTLIIFEIVHRTLAAMLGALAALAALAVGDRPSLTHVVEWIDFETLALLFGMMILVAVFSETG  
p-cas ASLQQTRLVPLLLAHQFLGASVEAQVASAVAILAGVYTLIIFEIVHRTLAAMLGALAALAALAVGDRPSLTHVVEWIDFETLALLFGMMILVAVFSETG

Wt 401 FFDYCAVKAYQLSRGRVWAMIFMLCLMAAILSAFLDNVTMMLFTPVTIRLCEVLNLDPRQVLI AEVIFTNIGGAATAIGDPPNVIIVSNQELRKMGLDF  
p-cas FFDYCAVKAYQLSRGRVWAMIFMLCLMAAILSAFLDNVTMMLFTPVTIRLCEVLNLDPRQVLI AEVIFTNIGGAATAIGDPPNVIIVSNQELRKM ANFT

Wt 501 AGFTAHMFLGICLVLLVSFPLLRLLYWNKKLYNKEPSEIVELKHEIHVWRLTAQRISPASREETA VRGLLLEKVLALHLLAQRLHTFHRQISQEDKNWE  
p-cas GRQKLGQYSRATKKAQDFRQESACQVPDGAGICHHLVLSQLLCPWHSS\*-----

Wt 601 TNIQELQRKHRSRSLLVKCLTVLGFVISMFFLNSFVPGIHLDLGWIAILGAIWLLILADIHDFEILHRVEWATLLFFAALFVLMEALTHLHLVEYVG  
p-cas -----

Wt 701 EQTALLIKMPEDQRFAAAIVLIVVWSALASSLIDNIPFTATMIPVLLNLSQDPEISLPALPLMYALALGACLGNGTLIGASTNVVCAGIAEKHGYGFS  
p-cas -----

Wt 801 FMEFFRLGFPVMLMSCTIGMICYLLIAHIVVGWN  
p-cas -----

**Supplementary data 2.** Comparison of amino acid sequences deduced from the cDNA sequences between the wild-type *Oca2*<sup>+</sup> (Wt) allele and the mutant *Oca2*<sup>p-cas</sup> (p-cas) allele. Amino acid substitutions are colored in red. The total number of amino acids in the wild-type allele was 833, whereas that of the mutant allele was only 549 due to complete deletion of exons 15 and 16. The *Oca2*<sup>p-cas</sup> cDNA sequence was deposited in the DDBJ/EMBL/GenBank databases with the accession number AB716353. \*: creation of a new stop codon; -: deletion.

Wt -968 GCGGGGGGGGTTGAGCAAAATGGCTCAGCAAGTAAAGGCACTTGCTGCGGAACCCAGTGACCTGACTTTGGTCACTGGAAACCACACGCTAGAAGGAGA  
p-cas GGGGGTGGGGGTGAGCAAAATGGCTCAGCAAGTAAAGGCACTTGCTGCGGAACCCAGTGACCTGACTTTGGTCACTGGAAACCACACGCTATAAGGAGA

Wt -868 AAAGTAACTCCGCGAGTTGTCTCCTGTGGCATGCATGAA-----CACACACACACACACACACACACACACACACACACACACACTCA  
p-cas AAAGTAACTCTGCGAGTTGTCTCCCGTGGCATGCATGAAACACACACACACACACACACACACACACACACACACACACACACTCA

Wt -768 TACAAAATAGTTTAAAAATTTAAAAGTCTGTGAATGATGGGGGAGTGGAAAGCAGCTCCCTTGGCTGTTACAGTGACTACTTTAACCCTTTGCTAATCTG  
p-cas TACAAAATAGTTTAAAAATTTAAAAGTCTGTGAATGATGGGGGAGTGGAAAGCAGCTCCCTTGGCTGTTACAGTGACTACTTTAACCCTTTGCTAATCTG

Wt -668 TATGGAGGCACTGGGACTGCTGGATTCTGGCACTGTGTCATCCTGTAGTTCATGTCTGCATGTATGATATGTCTTATGTGCCTGCTTCTGTACCTGTG  
p-cas TATGGAGGCACTGGGACTGCTGGATTCTGGCACTGTGTCATCCTGTAGTTTATGTCTGCATGTATGATATGTCTTATGTGCCTGCTTCTGTACCTGTG

Wt -568 TGTGTCTCTCTCTTTGTGTATGACTTCATGAGTGTGGTGGTCTGTGCATGTTGTGTTTATAACTGCATATCCCTCCTTCTATATGGGCTTTTGGGTAT  
p-cas TGTGTCTCTCTCTGTGTGTATGACTTCATGAGTGCATTGGGTCTGTGCATTTGTGTTTGTAACTGCATATCCCTCCTTCTATATGGGCTTTTGGGTAT

Wt -468 TTGTACAGTTTGTGTATTTCCATGTAATTTATCATTCTGTGAGCAGTCTTTGCGTATTTATTCATGGTCATGGTGTGTGGTATGATGGAGCTTTCCTT  
p-cas TTGTACAGTTTGTGTGTTTCCATGTAATTTATCATTCTGTGAGCAGTCTTTGCGTATTTATTCATGGTCATGCGTGTGCGGTTTGATGGAGCTTTCCTT

Wt -368 GGATGTAACCTTGCCACACTCCTGAGTTGGAGGAGACAAGATAATGAGAAAGTTTATCCTCTTCAGTAGACAGTTCTTACAATGCAGAACAATTTATA  
p-cas GGATGTAACCTTGCCACACTCCTGAGTTGGAGGAGACAAGATAATGAGAAAGTTTATCCTCTTCAGTAGACAGTTCTTACAATGCAGAACAATTTATA

Wt -268 TTTCTCAGTTCTTGCCTTAAGGTA AAAATCTGCCACGTCCTATGCCACCTATGAAGGCTTGAGCTTGCTACACATGGCTGGAATTTTCCAAAAGCCTGGC  
p-cas TTTCTCAGTTCTTGCCTTAAGGTA AAAATCTGCCACGTCCTATGCCACCTATGAAGGCTTGAGCTTGCTACACATGGCTGGAATTTTCCAAAAGCCTGGC

Wt -168 TTCTACAGCAAGGCTCTCTGTTTTCCAGCTGAGGCTCCTGCATGCTGCTGGACCATTCTCAAGAGGGGGCTGGAGCCACTGAGCCTTCAACTTTGTGAA  
p-cas CACTGCAGCAAGGCTCTCTGTTTTCCAGCTGAGGCTCCTGCATGCTGCTGGACCATTCTCAAGAGGGGGCTGGAGCCACTGAGCCTTCAACTTTGTGAA

Wt -68 GGTCTGTGGGCGTGGCCAGCACAGGGTGCAGTGAGGAGCACAAGCTATCCAACCCTCCCTCTGGGGCTGCAAGTGCCTGCTGAGAAATCTTACACCAGGG  
p-cas GGTCTGTGGGTGTGGCCAGCAGAGGGTGCAGTAAGGAGCACAAGCTATCCAACCCTCCCTCTGGGGCTGCAAGTGCCTGCTGAGAAATCTTACACCAGGG

Wt 33 TTGTGCTCCATCCACGACTCAGAGCCTTTGGATCTGGACACTAGACTTCACTGCTGGAGAGAGATCAGCGAGTCATCAGACAGATCAGCAACGGGGACATG  
p-cas TTGTGCTCCATCCACGACTCAGAGCCTGTGGATCTGGACACTAGACTTCACTGCTGGAGAGAGATCAGCGAGTCATCAGACAGATCAGCAACGGGGACATG

Met

**Supplementary data 3.** Comparison of a 968-bp sequence of the promoter regions between the wild-type *Oca2*<sup>+</sup> (Wt) and mutant *Oca2*<sup>p-cas</sup> (p-cas)

alleles. The nucleotide G colored in blue indicates the transcriptional start site (+1) of exon 1. The three nucleotides ATG colored in blue indicate an initiation codon coding for methionine residue (Met). Putative DNA binding domains searched for by the web-based software program TFSEARCH (<http://www.cbrc.jp/research/db/TFSEARCH.html>) are shown by the boxed nucleotides labeled with letters a to d. a: OSE2 (osteoblast-specific cis-acting element 2) motif; b: RUNX1 (runt-related transcription factor 1) binding motif; c: zinc finger motif; d: homeodomain motif. Nucleotide substitutions are colored in red. The *Oca2*<sup>P-cas</sup> promoter sequence was deposited in the DDBJ/EMBL/GenBank databases with the accession number AB716354. -: deletion.



**Supplementary data 4.** Comparison of *Oca2<sup>p-cas</sup>* expression levels in eyes between novel and ordinary mutant mice. The expression levels were determined by a quantitative relative standard curve method of RT-qPCR and normalized to two endogenous control genes of *Actb* and *B2m*. Data are expressed as the mean and one standard error for three mice at about 4 months of age. There was no significant difference in expression level between the two types of mutant mice (t-test,  $P=0.404$ ).
